# Supplementary material
Source: PubMed Central journal article supplement (PMC5669346)
Supplement: JCB705259_supplementary_material.pdf [file JCB705259_supplementary_material.pdf]

## Supplemental Figures

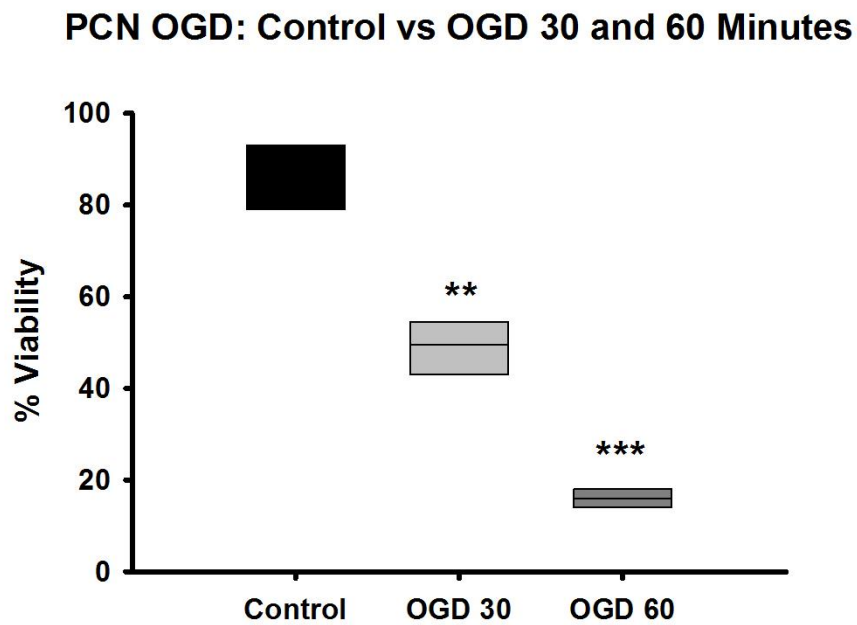

### Supplemental Figure

**Supplemental Figure 1. Optimization of OGD Conditions.** OGD was initially performed on primary cortical neuron cultures using control (no OGD), 30-minute exposure, and 60-minute exposure followed by reperfusion. Mean cell survival was more than 50% of cells after 30 minutes versus a mean cell survival of less than 20% for 60 minutes of OGD. In both cases, differences were significant compared to controls.

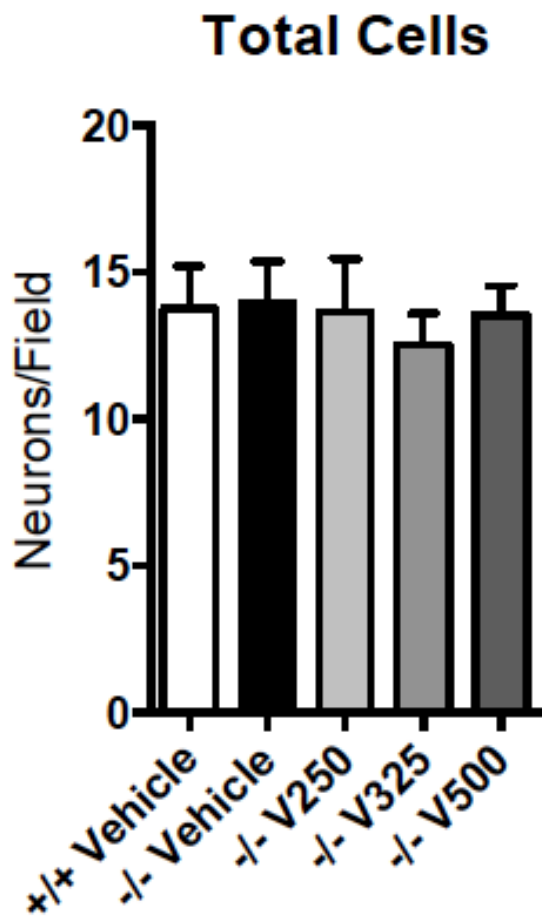

Supplemental Figure 2

**Supplemental Figure 2. Overall mean cell count for each group.** Following the 30-minute OGD and 24-hour reperfusion protocol, overall cells were counted, which did not significantly differ across groups. Thus, any differences in cell viability or complexity could not be attributed to differences in overall cell count.
